# Supplementary material for: The house fly Y Chromosome is young and minimally differentiated from its ancient X Chromosome partner
Source: HighWire-hosted journal article supplement (doi:10.1101/gr.215509.116), 2017-06-15
Supplement: Supp_Data_Methods.pdf [file Supp_Data_Methods.pdf]

**Supplemental Data S1**

Read mapping coverage of male and female aabys sequences to house fly genes.

**Supplemental Data S2**

Read mapping coverage of male and female aabys sequences to house fly genes.

**Supplemental Data S3**

Read mapping coverage of male and female aabys sequences to house fly genes.

**Supplemental Data S4**

Information on blastx hits to male scaffolds with highest percent unmatched by female sequencing reads, and >5kb male scaffolds with >50% unmatched by female reads.

**Supplemental Data S5**

Sequences of male scaffolds with the highest percent unmatched by female sequencing reads

**Supplemental Data S6**

Sequences of male scaffolds that are >5kb and >50% unmatched by female reads.

**Supplemental Data S7**

Information about the 214 1kb windows that are 2-fold enriched in coverage in males vs females or in females vs males.

**Supplemental Methods S1**

Example pipeline for the YGS approach to identify male-specific contigs/scaffolds.

**Supplemental Methods S2**

Script used as part of YGS.sh pipeline.

**Supplemental Methods S3**

Example pipeline for SNP calling.
