# Supplementary material for: The house fly Y Chromosome is young and minimally differentiated from its ancient X Chromosome partner
Source: HighWire-hosted journal article supplement (doi:10.1101/gr.215509.116), 2017-06-15
Supplement: Supplemental_Data_S4.xlsx [file Supplemental_Data_S4.xlsx]

## Sheet: Highest_Percent_Unmatched
These male scaffolds have highest percent unmatched by female sequencing reads
Scaffold	singlecopy_kmers	singlecopy_kmers_unmatched	perc_unmatched	validated_singlecopy_kmers	validated_singlecopy_kmers_unmatched	Perc_valid_unmatched	ProteinID_of_BestHousefly_blastxHit	GeneID_of_BestHousefly_blastxHit	AnnotationInfo_for_OtherBlastHits
scaffold129665	29	28	96.6	29	28	96.6	XP_011292875.1	LOC101893563	CG34394
scaffold129727	12	11	91.7	9	8	88.9	-	-	-
C14639107	358	308	86	339	289	85.3	-	-	TE
scaffold68148	243	210	86.4	214	181	84.6	-	-	Bactrocera dorsalis LOC109580006
C14640125	778	660	84.8	758	640	84.4	-	-	TE
C14642927	220	187	85	203	170	83.7	XP_019892680.1	LOC101893147	CG3921 (bark beetle)
scaffold264262	274	230	83.9	267	223	83.5	-	-	TE
C14689871	288	243	84.4	271	226	83.4	-	-	TE
scaffold295476	368	311	84.5	341	284	83.3	XP_019895044.1	LOC109614169	TE
scaffold280562	184	153	83.2	183	152	83.1	-	-	-
C14863245	783	650	83	775	642	82.8	-	-	TE
scaffold213111	224	185	82.6	224	185	82.6	-	-	TE
scaffold40850	92	76	82.6	92	76	82.6	-	-	-
scaffold68493	194	160	82.5	194	160	82.5	-	-	TE
scaffold42588	132	110	83.3	126	104	82.5	-	-	TE
C14616581	259	216	83.4	240	198	82.5	-	-	TE
scaffold4513	223	184	82.5	223	184	82.5	-	-	-
scaffold97594	147	121	82.3	147	121	82.3	XP_019895089.1	LOC109614190	uncharacterized
C14595651	333	277	83.2	307	252	82.1	XP_019894240.1	LOC109613628	uncharacterized
C14873519	1058	890	84.1	932	764	82	XP_005189746.1	LOC101895747	TE
scaffold221016	232	196	84.5	196	160	81.6	XP_005183339.2	LOC101899534	Dpse_GA30902
scaffold76293	99	81	81.8	98	80	81.6	-	-	-
scaffold239067	169	139	82.2	162	132	81.5	-	-	TE
scaffold239929	518	423	81.7	511	416	81.4	-	-	TE
scaffold12861	86	70	81.4	86	70	81.4	-	-	-
scaffold31884	264	215	81.4	264	215	81.4	-	-	-
scaffold324535	102	83	81.4	102	83	81.4	-	-	-
scaffold60140	381	311	81.6	367	298	81.2	-	-	TE
scaffold307136	546	452	82.8	499	405	81.2	-	-	TE
scaffold137395	259	212	81.9	247	200	81	-	-	TE
C14644717	161	131	81.4	158	128	81	-	-	uncharacterized
scaffold318613	256	210	82	241	195	80.9	-	-	TE
scaffold112378	77	64	83.1	67	54	80.6	-	-	TE
scaffold179319	569	462	81.2	551	444	80.6	-	-	TE
scaffold121110	463	373	80.6	463	373	80.6	-	-	TE
C14749358	446	359	80.5	446	359	80.5	-	-	-
scaffold262906	135	109	80.7	133	107	80.5	-	-	-
C14611941	421	339	80.5	419	337	80.4	XP_019891721.1	LOC109612255	TE
scaffold108218	102	82	80.4	102	82	80.4	-	-	TE
scaffold321547	354	290	81.9	327	263	80.4	-	-	TE
scaffold204152	318	263	82.7	279	224	80.3	-	-	-
scaffold325134	232	186	80.2	232	186	80.2	XP_019895231.1	LOC109614271	TE
scaffold107822	96	77	80.2	96	77	80.2	-	-	TE
scaffold160956	133	108	81.2	125	100	80	-	-	uncharacterized
scaffold68777	10	8	80	10	8	80	-	-	-
scaffold198354	189	151	79.9	189	151	79.9	-	-	-
scaffold322433	415	332	80	411	328	79.8	XP_005190595.1	LOC101889892	uncharacterized
scaffold313973	366	297	81.1	341	272	79.8	-	-	TE
scaffold22058	99	79	79.8	99	79	79.8	-	-	-
scaffold206567	133	106	79.7	133	106	79.7	-	-	TE

## Sheet: SOAPdenovo_5k_50perc
These male scaffolds are >5kb long and at least 50% unmatched by female reads
Scaffold	singlecopy_kmers	singlecopy_kmers_unmatched	perc_unmatched	validated_singlecopy_kmers	validated_singlecopy_kmers_unmatched	Perc_valid_unmatched	Scaffold_length	ProteinID_of_BestHousefly_blastxHit	GeneID_of_BestHousefly_blastxHit	AnnotationInfo_for_OtherBlastHits
scaffold205806	1543	1211	78.5	1467	1135	77.4	6307	XP_019895089.1	LOC109614190	uncharacterized
scaffold331041	1991	1571	78.9	1757	1339	76.2	5535	XP_019894507.1	LOC109613799	TE
scaffold337623	935	683	73	912	660	72.4	5199	uncharacterized protein…	-	-
scaffold213142	1245	890	71.5	1242	887	71.4	5622	-	-	TE
scaffold333788	1208	879	72.8	1142	815	71.4	5043	-	-	TE
scaffold299140	2246	1656	73.7	2044	1457	71.3	7747	XP_019894112.1	LOC109613569	TE
scaffold290411	813	569	70	813	569	70	5420	XP_011291061.1	LOC105261593	TE
scaffold209952	1004	715	71.2	961	672	69.9	5993	XP_019894542.1	LOC109613826	TE
scaffold290395	2364	1711	72.4	2153	1500	69.7	9047	XP_005190182.1	LOC101899716	TE
scaffold337793	1282	910	71	1218	847	69.5	5614	XP_005190182.1	LOC101899716	-
scaffold22262	792	562	71	754	524	69.5	5339	XP_019894600.1	LOC109613886	TE
scaffold163280	1382	996	72.1	1253	868	69.3	6420	-	-	TE
scaffold133114	974	677	69.5	933	636	68.2	5455	-	-	TE
scaffold204	1002	682	68.1	995	675	67.8	6770	XP_019890701.1	LOC109611832	TE
scaffold313856	826	560	67.8	797	533	66.9	6073	-	-	TE
scaffold324661	1806	1206	66.8	1750	1151	65.8	7193	-	-	TE
scaffold210401	1334	901	67.5	1250	819	65.5	6977	-	-	TE
scaffold322958	1195	802	67.1	1134	742	65.4	7336	uncharacterized protein…	-	-
scaffold251566	757	501	66.2	735	479	65.2	5177	XP_005178734.1	LOC101889679	death-associated inhibitor of apoptosis 1
scaffold186067	1159	776	67	1023	640	62.6	5201	XP_019894646.1	LOC101891673	zinc finger protein
scaffold95909	1483	898	60.6	1483	898	60.6	6221	-	-	TE
scaffold203330	1287	771	59.9	1274	760	59.7	6382	-	-	Calcium channel
